# Supplementary material
Source: PubMed Central journal article supplement (PMC3394396)
Supplement: NIHMS365475-supplement-1_si_001.pdf [file NIHMS365475-supplement-1_si_001.pdf]

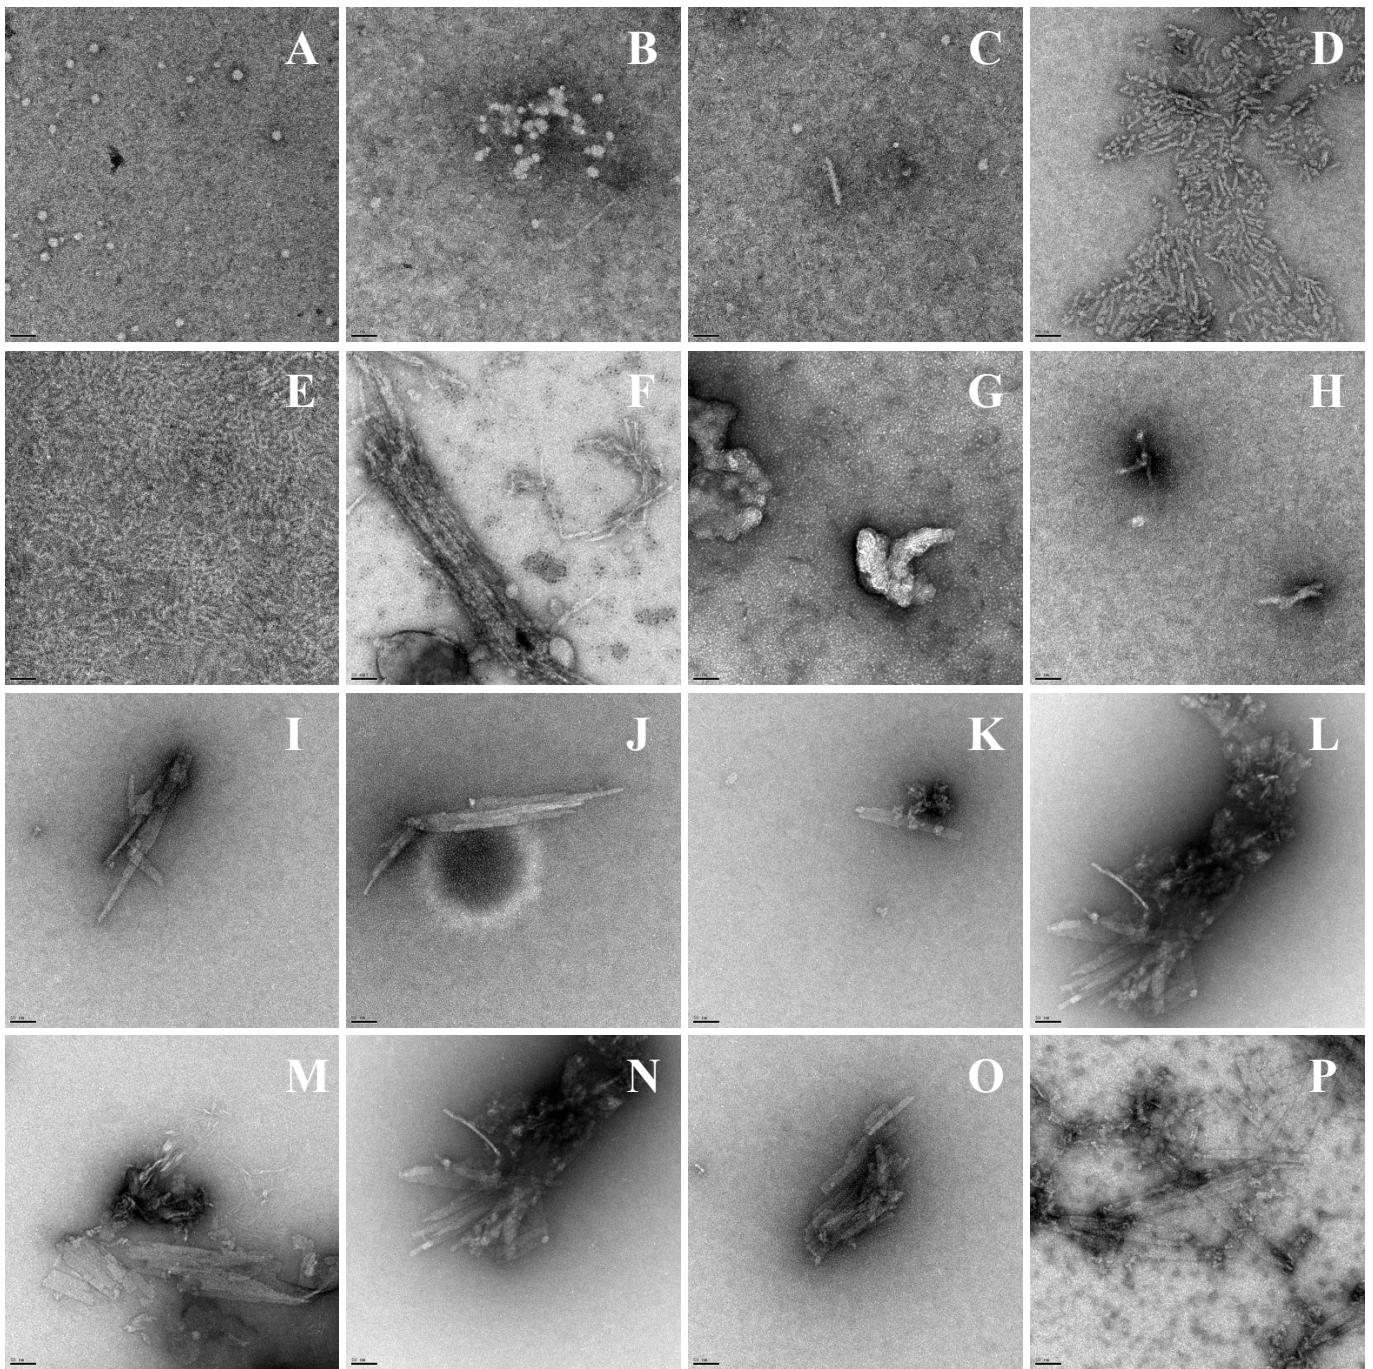

Figure S1. Electron micrographs of various time points of an aggregation reaction of  $\text{htt}^{\text{NT}}\text{Q}_{30}\text{P}_6\text{K}_2$  in the presence of a 1:1 molar ratio of  $\text{htt}^{\text{NT}}$ . Samples were analyzed at: 2.5 hrs (A, F); 5.5 hrs (B, C, G, H); 8.0 hrs (D, I-P); and 24 hrs (E). Scale bar = 50 nm.
